# Supplementary material
Source: MDPI journal article supplement (https://www.mdpi.com/1999-4907/14/6/1272)
Supplement: s1 [file s1 › forests-2325113-supplementary.pdf]

## Supplementary Materials

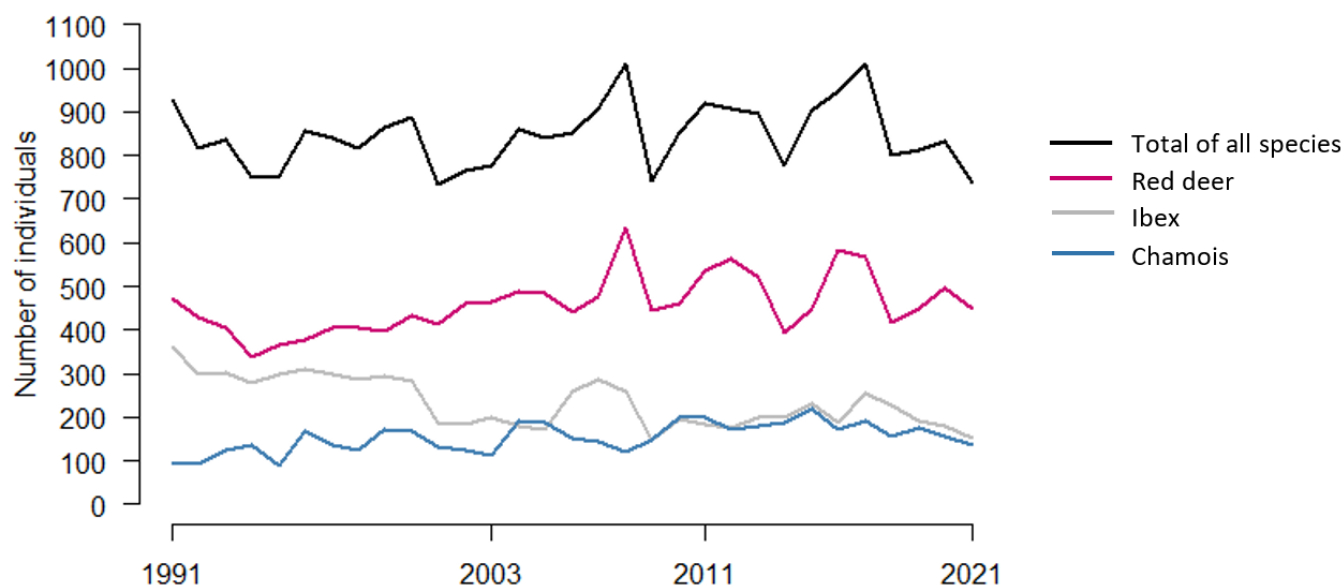

**Figure S1.** Development of the number of wild ungulates. Annual census counts of red deer (pink), ibex (grey), and chamois (blue), and the total number of all ungulate species (black) in Val Trupchun between 1991 and 2021 (data provided by the Swiss National Park; for a description of methodology, see Anderwald et al. [23]). The four sampling years of the monitoring program are indicated on the x-axis.

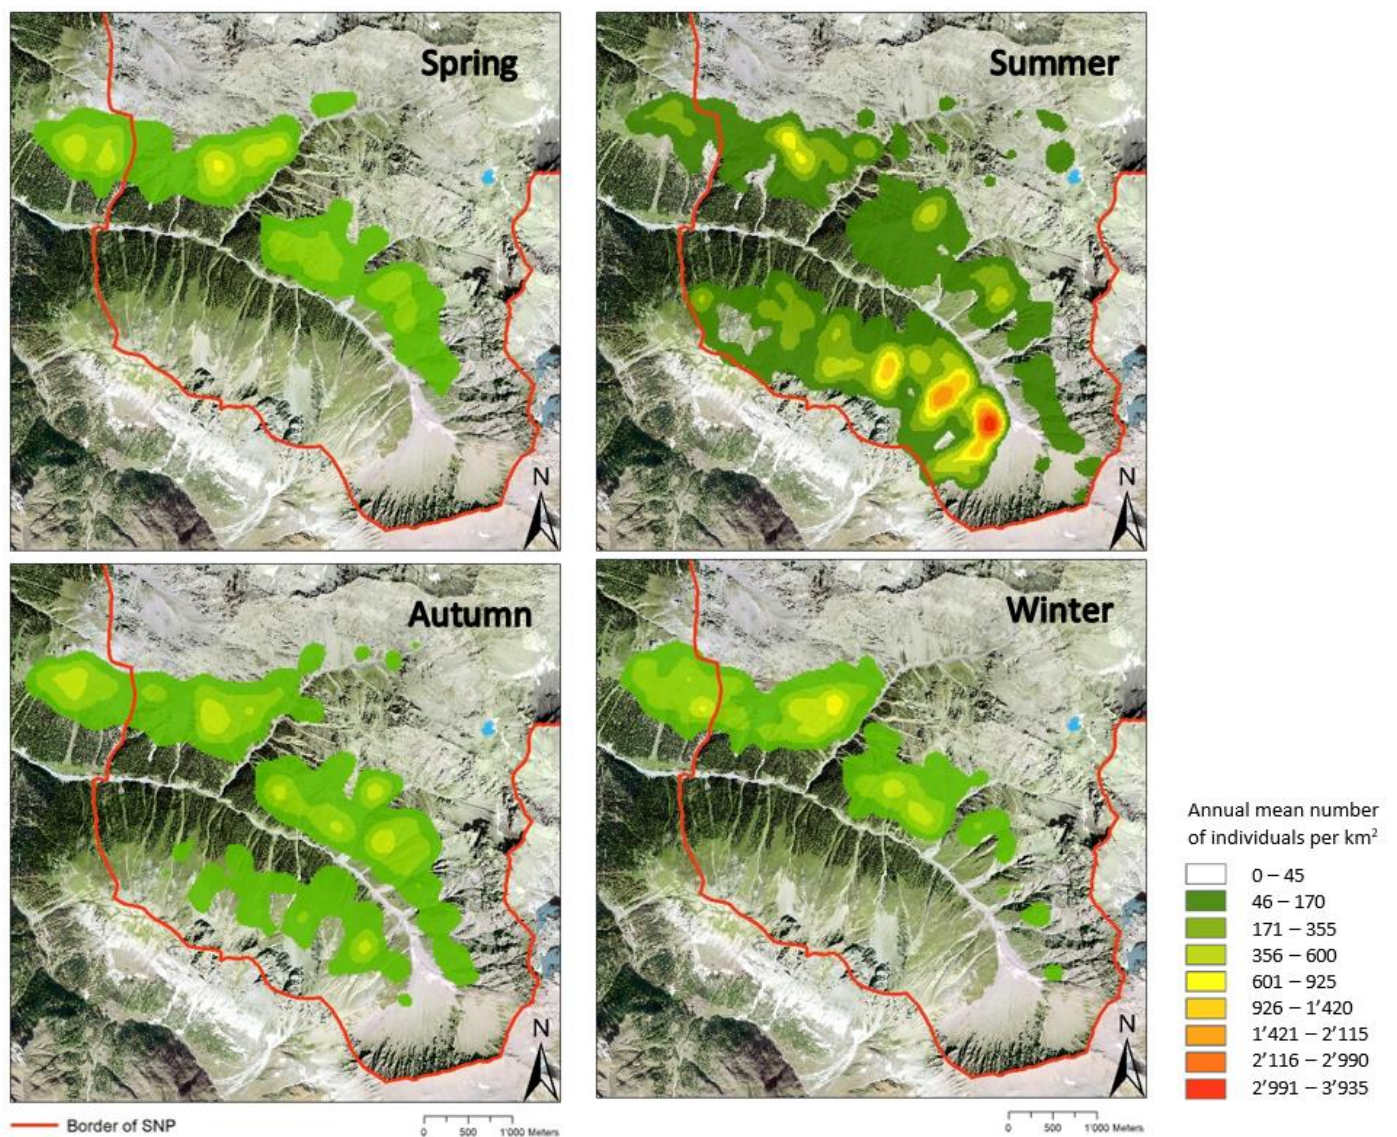

**Figure S2.** Heatmap of the annual mean number of ungulates (red deer, chamois, and ibex), based on visual observation data from the SNP between 2012 and 2021 (data provided by the Swiss National Park; for a description of methodology, see Anderwald et al. [23]).

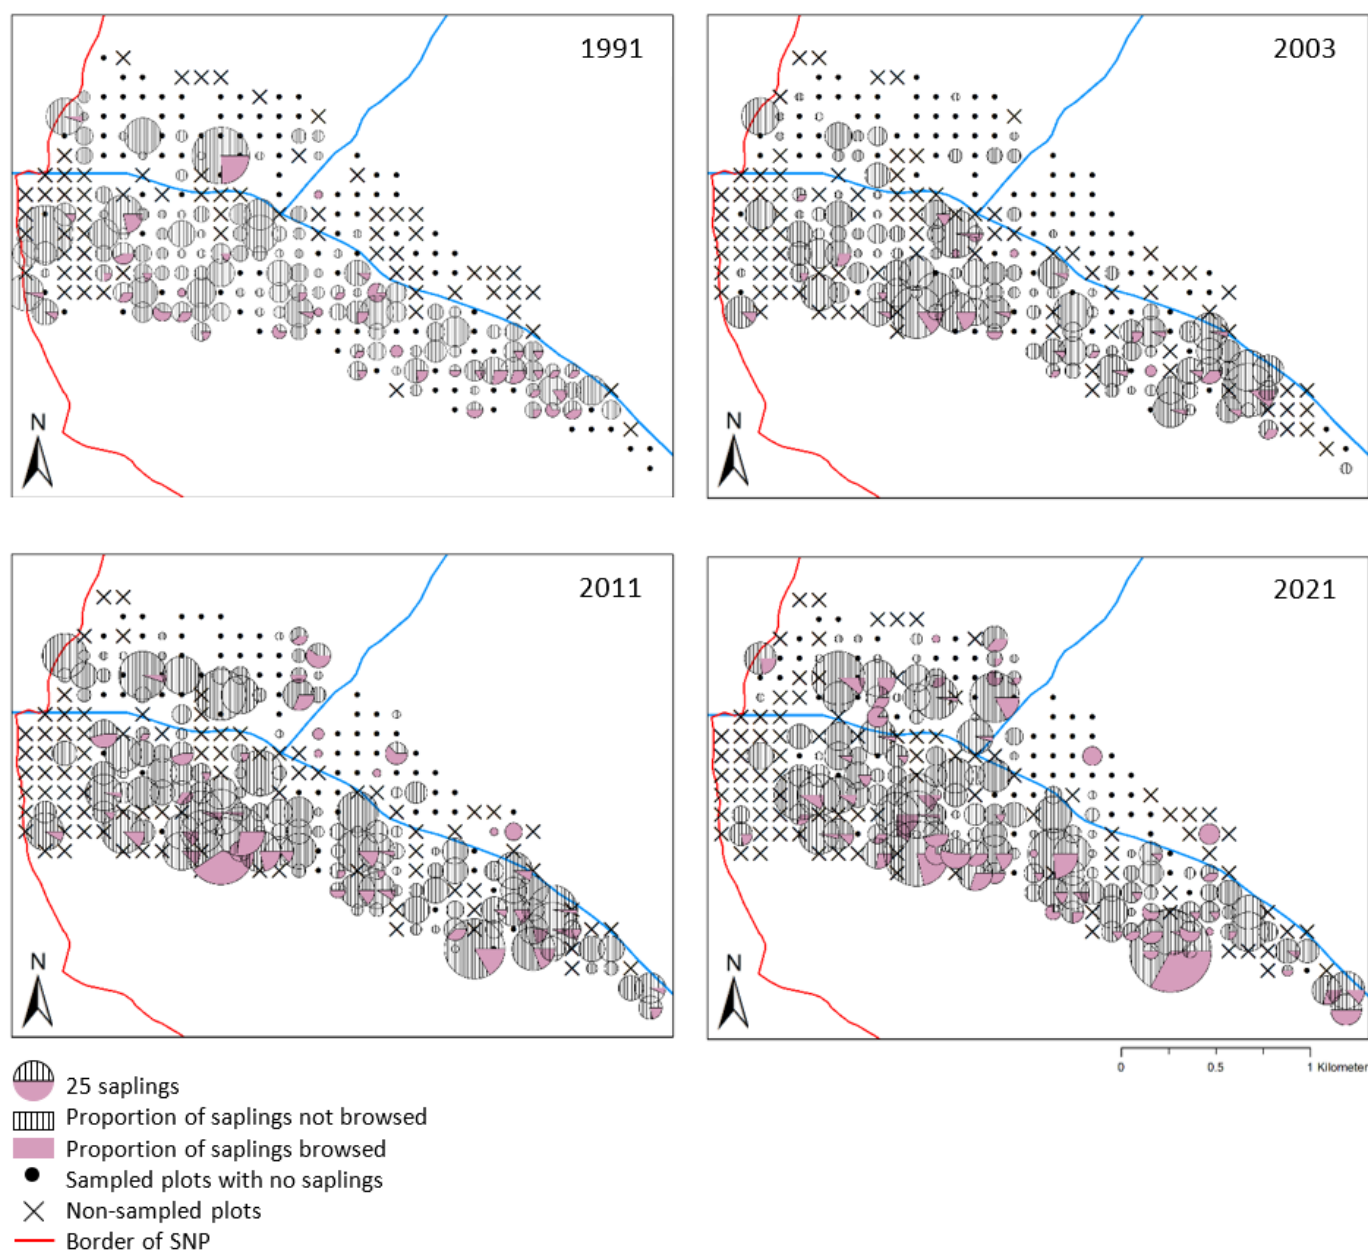

**Figure S3.** Distribution of sampling plots, numbers of saplings, and proportions of saplings that have been browsed over the four sampling years in Val Trupchun. Pie charts show sampling plots with saplings, dots are sampling plots without saplings, and crosses are plots that were not sampled. Sizes of pie charts represent the number of saplings. Striped patterns of the pie chart indicate saplings that have not been browsed, and pink colored areas indicate saplings that have been browsed.

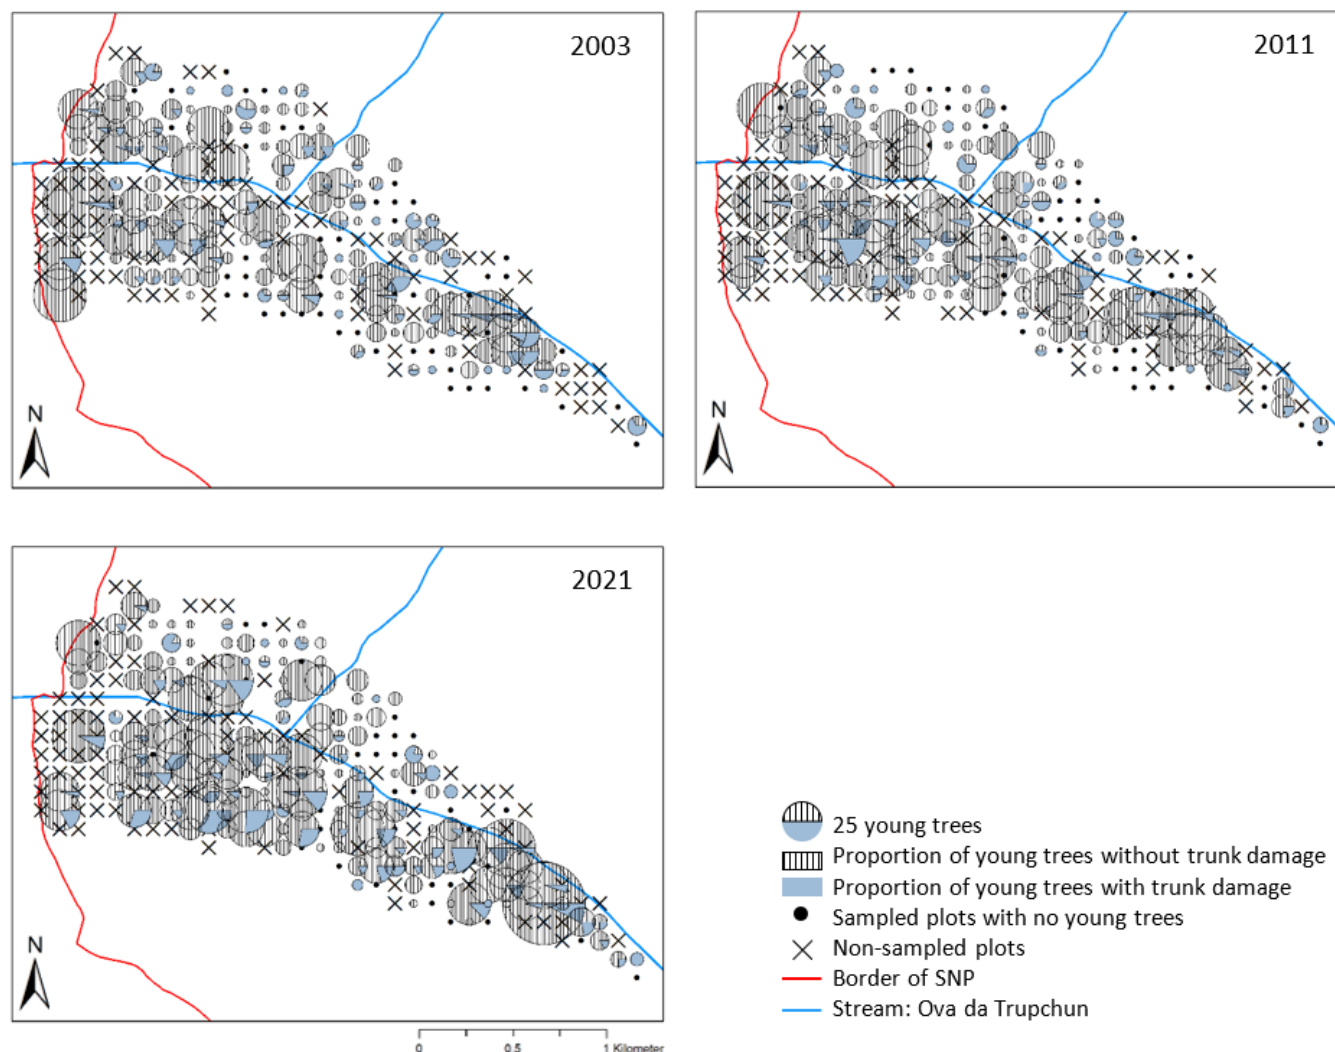

**Figure S4.** Distribution of sampling plots, numbers of young trees, and proportions of young trees that show trunk damage by wild ungulates over three sampling years in Val Trupchun. Pie charts show plots with young trees, dots are sampling plots without young trees, and crosses are plots that were not sampled. Sizes of pie charts represent the number of young trees. Striped patterns of the pie chart indicate young trees with no damage to their trunks, and blue colored areas indicate young trees with damaged trunks.

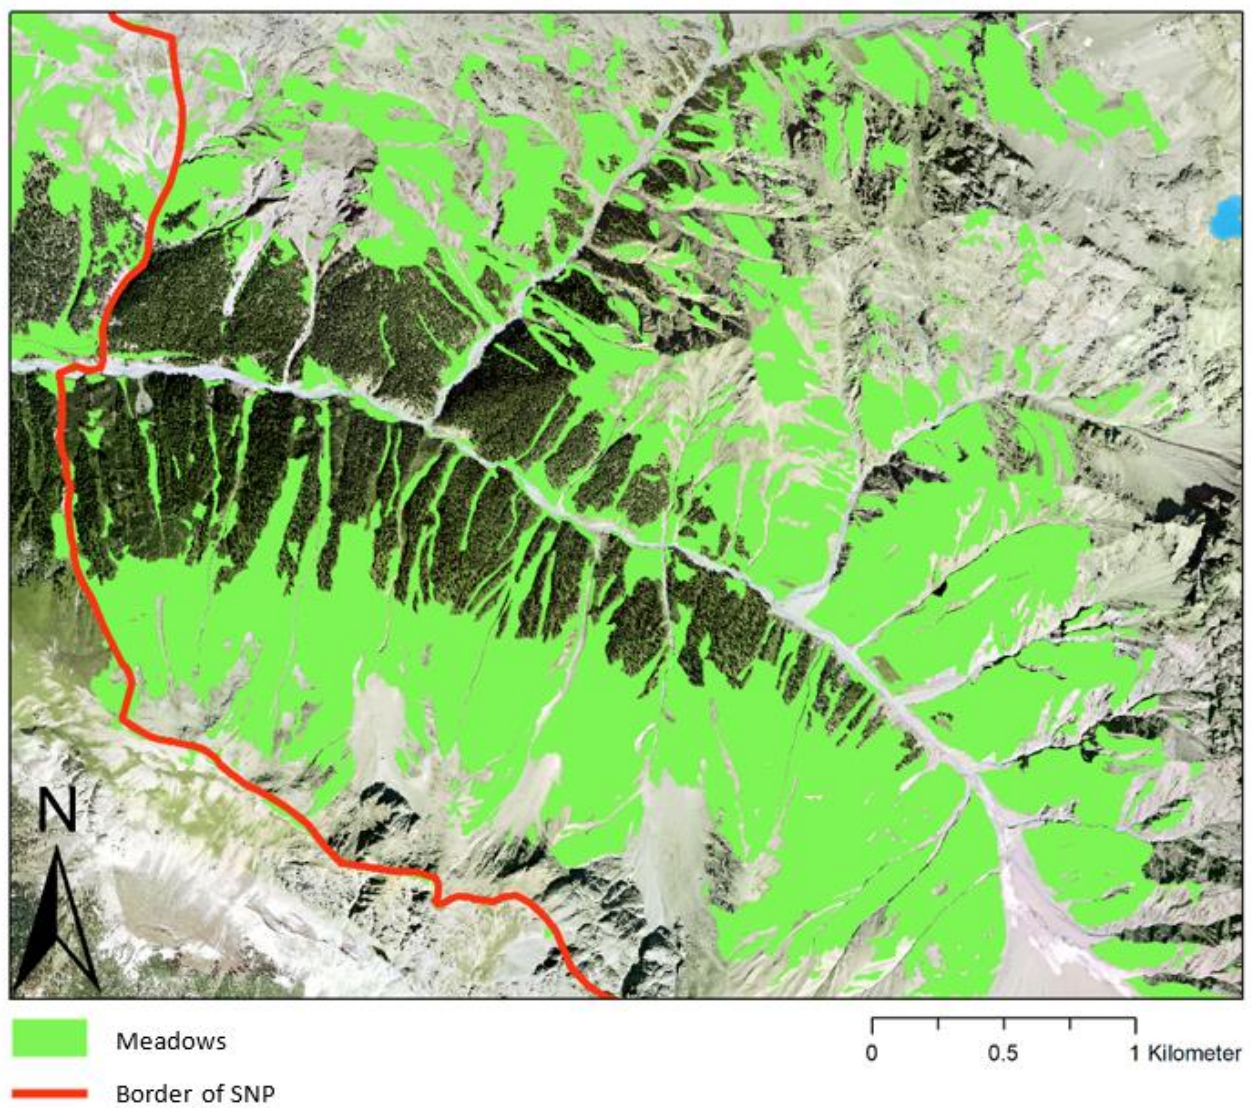

Figure S5. Location of meadows in Val Trupchun [29].

**Table S1.** Estimated browsing probabilities with 95% compatibility intervals for the different tree species and developmental stages, and for the minimum and maximum values of the numeric predictors. To calculate the browsing probabilities, the values of the variables not in focus were kept on their means (for numeric variables) and on the category with the largest sample size (categorical variables).

| Predictor                                  | Estimated browsing probability | 95% compatibility interval |                |
|--------------------------------------------|--------------------------------|----------------------------|----------------|
|                                            |                                | 2.5% quantile              | 97.5% quantile |
| Tree species <sup>1</sup>                  |                                |                            |                |
| Larch                                      | 0.15                           | 0.096                      | 0.22           |
| Spruce                                     | 0.084                          | 0.046                      | 0.15           |
| Cembra pine                                | 0.019                          | 0.011                      | 0.033          |
| Developmental stage <sup>2</sup>           |                                |                            |                |
| 2                                          | 0.049                          | 0.026                      | 0.091          |
| 3                                          | 0.15                           | 0.096                      | 0.22           |
| 4                                          | 0.11                           | 0.070                      | 0.17           |
| 5                                          | 0.13                           | 0.080                      | 0.19           |
| 6                                          | 0.072                          | 0.041                      | 0.12           |
| Elevation <sup>3</sup>                     |                                |                            |                |
| min.: 1835 m.a.s.l                         | 0.049                          | 0.021                      | 0.12           |
| max.: 2225 m.a.s.l                         | 0.31                           | 0.19                       | 0.48           |
| Northness <sup>3</sup>                     |                                |                            |                |
| -1 (south)                                 | 0.31                           | 0.18                       | 0.49           |
| 1 (north)                                  | 0.12                           | 0.079                      | 0.19           |
| Eastness <sup>3</sup>                      |                                |                            |                |
| -1 (west)                                  | 0.087                          | 0.048                      | 0.15           |
| 1 (east)                                   | 0.21                           | 0.13                       | 0.31           |
| Slope <sup>3</sup>                         |                                |                            |                |
| min.: 16%                                  | 0.19                           | 0.10                       | 0.35           |
| max.: 138%                                 | 0.093                          | 0.033                      | 0.22           |
| Number of saplings <sup>3</sup>            |                                |                            |                |
| min.: 1                                    | 0.15                           | 0.098                      | 0.23           |
| max.: 112                                  | 0.092                          | 0.032                      | 0.25           |
| Average developmental stage <sup>3</sup>   |                                |                            |                |
| min.: 1.89                                 | 0.17                           | 0.099                      | 0.28           |
| max.: 6                                    | 0.12                           | 0.060                      | 0.22           |
| Shannon index <sup>3</sup>                 |                                |                            |                |
| min.: 0                                    | 0.18                           | 0.12                       | 0.28           |
| max.: 1.27                                 | 0.10                           | 0.056                      | 0.18           |
| Distance to next hiking trail <sup>3</sup> |                                |                            |                |
| min.: 2 m                                  | 0.12                           | 0.068                      | 0.20           |
| max.: 583 m                                | 0.21                           | 0.099                      | 0.41           |
| Distance to next meadow <sup>3</sup>       |                                |                            |                |
| min.: 0 m                                  | 0.15                           | 0.098                      | 0.23           |
| max.: 166 m                                | 0.11                           | 0.038                      | 0.27           |

<sup>1</sup>Point estimates and 95% compatibility intervals refer to developmental stage 3.

<sup>2</sup>Point estimates and 95% compatibility intervals refer to larch.

<sup>3</sup>Point estimates and 95% compatibility intervals refer to larch in developmental stage 3.

**Table S2.** Pearson correlation coefficients of the untransformed model predictors.

|                               | Tree species | Dev. stage | Elev.  | North.  | East.   | Slope  | Num. of saplings | Av. dev. stage | Shannon index | Dist. to hiking trail | Dist. to meadow |
|-------------------------------|--------------|------------|--------|---------|---------|--------|------------------|----------------|---------------|-----------------------|-----------------|
| Tree species                  | 1            |            |        |         |         |        |                  |                |               |                       |                 |
| Developmental stage           | 0.11         | 1          |        |         |         |        |                  |                |               |                       |                 |
| Elevation                     | -0.041       | 0.017      | 1      |         |         |        |                  |                |               |                       |                 |
| Northness                     | -0.14        | 0.16       | 0.33   | 1       |         |        |                  |                |               |                       |                 |
| Eastness                      | -0.050       | 0.084      | 0.069  | 0.11    | 1       |        |                  |                |               |                       |                 |
| Slope                         | -0.0062      | -0.019     | 0.088  | -0.0065 | -0.0047 | 1      |                  |                |               |                       |                 |
| Number of saplings            | 0.0062       | 0.0052     | 0.076  | 0.014   | -0.15   | 0.036  | 1                |                |               |                       |                 |
| Average developmental stage   | 0.013        | 0.54       | 0.029  | 0.23    | 0.14    | -0.064 | -0.073           | 1              |               |                       |                 |
| Shannon index                 | -0.032       | 0.024      | -0.097 | 0.29    | 0.16    | 0.064  | 0.20             | -0.025         | 1             |                       |                 |
| Distance to next hiking trail | 0.0053       | -0.078     | 0.74   | 0.045   | -0.15   | 0.052  | 0.19             | -0.12          | -0.11         | 1                     |                 |
| Distance to next meadow       | 0.061        | -0.14      | -0.39  | -0.26   | -0.26   | -0.040 | -0.17            | -0.20          | -0.11         | -0.12                 | 1               |

**Table S3.** Total numbers of saplings and numbers of saplings being browsed.

| Saplings                |                                             |                   |                     |                         |                     |
|-------------------------|---------------------------------------------|-------------------|---------------------|-------------------------|---------------------|
| Northeast-exposed slope |                                             |                   |                     | Southwest-exposed slope |                     |
| Year                    | Tree species                                | Total individuals | Browsed individuals | Total individuals       | Browsed individuals |
| 1991                    | Larch                                       | 384               | 52                  | 13                      | 1                   |
|                         | Cembra pine                                 | 215               | 5                   | 1                       | 0                   |
|                         | Spruce                                      | 51                | 0                   | 109                     | 13                  |
|                         | Mountain ash                                | 21                | 8                   | 0                       | 0                   |
|                         | Upright mountain pine                       | 0                 | 0                   | 7                       | 0                   |
|                         | Total                                       | 671               | 65                  | 130                     | 14                  |
|                         | Ratio of browsed and total individuals in % | 9.7%              |                     | 10.8%                   |                     |
| 2003                    | Larch                                       | 443               | 44                  | 15                      | 0                   |
|                         | Cembra pine                                 | 361               | 8                   | 3                       | 0                   |
|                         | Spruce                                      | 42                | 5                   | 62                      | 0                   |
|                         | Mountain ash                                | 4                 | 1                   | 0                       | 0                   |
|                         | Upright mountain pine                       | 5                 | 0                   | 0                       | 0                   |
|                         | Total                                       | 855               | 58                  | 80                      | 0                   |
|                         | Ratio of browsed and total individuals in % | 6.8%              |                     | 0%                      |                     |
| 2011                    | Larch                                       | 623               | 110                 | 61                      | 26                  |
|                         | Cembra pine                                 | 594               | 13                  | 32                      | 2                   |
|                         | Spruce                                      | 43                | 5                   | 192                     | 4                   |
|                         | Mountain ash                                | 53                | 9                   | 0                       | 0                   |
|                         | Upright mountain pine                       | 2                 | 0                   | 0                       | 0                   |
|                         | Total                                       | 1315              | 137                 | 285                     | 32                  |
|                         | Ratio of browsed and total individuals in % | 10.4%             |                     | 11.2%                   |                     |
| 2021                    | Larch                                       | 637               | 171                 | 84                      | 29                  |
|                         | Cembra pine                                 | 591               | 19                  | 15                      | 1                   |
|                         | Spruce                                      | 72                | 3                   | 202                     | 27                  |
|                         | Mountain ash                                | 10                | 0                   | 0                       | 0                   |
|                         | Upright mountain pine                       | 1                 | 0                   | 1                       | 0                   |
|                         | Total                                       | 1311              | 193                 | 302                     | 57                  |
|                         | Ratio of browsed and total individuals in % | 14.7%             |                     | 18.9%                   |                     |

**Table S4.** Total numbers of young trees and numbers of young trees with damaged trunks.

| Young trees             |                                             |                   |                               |                   |                               |
|-------------------------|---------------------------------------------|-------------------|-------------------------------|-------------------|-------------------------------|
| Northeast-exposed slope |                                             |                   | Southwest-exposed slope       |                   |                               |
| Year                    | Tree species                                | Total individuals | Individuals with trunk damage | Total individuals | Individuals with trunk damage |
| 2003                    | Larch                                       | 769               | 53                            | 125               | 12                            |
|                         | Cembra pine                                 | 171               | 19                            | 110               | 31                            |
|                         | Spruce                                      | 85                | 12                            | 228               | 11                            |
|                         | Mountain ash                                | 1                 | 0                             | 0                 | 0                             |
|                         | Upright mountain pine                       | 2                 | 0                             | 0                 | 0                             |
|                         | Total                                       | 1028              | 84                            | 463               | 54                            |
|                         | Ratio of damaged and total individuals in % | 8.2%              |                               | 11.7%             |                               |
| 2011                    | Larch                                       | 918               | 41                            | 103               | 8                             |
|                         | Cembra pine                                 | 198               | 37                            | 104               | 31                            |
|                         | Spruce                                      | 117               | 10                            | 241               | 14                            |
|                         | Mountain ash                                | 1                 | 0                             | 0                 | 0                             |
|                         | Upright mountain pine                       | 3                 | 0                             | 0                 | 0                             |
|                         | Total                                       | 1237              | 88                            | 448               | 53                            |
|                         | Ratio of damaged and total individuals in % | 7.1%              |                               | 11.8%             |                               |
| 2021                    | Larch                                       | 1195              | 103                           | 125               | 4                             |
|                         | Cembra pine                                 | 260               | 46                            | 81                | 23                            |
|                         | Spruce                                      | 116               | 13                            | 226               | 15                            |
|                         | Mountain ash                                | 4                 | 0                             | 0                 | 0                             |
|                         | Upright mountain pine                       | 0                 | 0                             | 3                 | 1                             |
|                         | Total                                       | 1575              | 162                           | 435               | 43                            |
|                         | Ratio of damaged and total individuals in % | 10.3%             |                               | 9.9%              |                               |
